# Supplementary material for: Banca Española verá más fusiones, La
Source: Royal Society of Chemistry journal article supplement (doi:10.1039/d2fo00206j), 1995-01-01
Supplement: d2fo00206j1.pdf [file d2fo00206j1.pdf]

1 **Improving selenium accumulation in broilers using *Escherichia coli***

2 **Nissle 1917 with surface-displayed selenite reductase SerV01**

3 Yuxin Gong <sup>a</sup>, Ying Wu<sup>a</sup>, Aman Khan <sup>a</sup>, Peizhi Song<sup>a</sup>, Zhenfei Wang<sup>a</sup>, Hongyuhang

4 Ni<sup>b</sup>, Jing Ji<sup>a</sup>, El-Sayed Salama<sup>c</sup>, Pu Liu<sup>a</sup>, Xiangkai Li<sup>a,\*</sup>

5

6 <sup>a</sup>Gansu Key Laboratory of Biomonitoring and Bioremediation for Environmental  
7 Pollution, School of Life Sciences, Lanzhou University, Tianshuinanlu #222, Lanzhou  
8 730000, Gansu, China

9 <sup>b</sup>Department of Infectious Diseases and Public Health, Jockey Club College of  
10 Veterinary Medicine and Life Sciences, City University of Hong Kong, Kowloon,  
11 Hong Kong

12 <sup>c</sup>Department of Occupational and Environmental Health, School of Public Health,  
13 Lanzhou University, Lanzhou, 730000, Gansu, PR China

14 \*Corresponding author: Xiangkai Li,

15 Full postal address: School of Life Sciences, Lanzhou University, Tianshuinanlu #222,  
16 Lanzhou 730000, Gansu, China

17 E-mail address: [xkli@lzu.edu.cn](mailto:xkli@lzu.edu.cn)

18 Tel./fax: +86 931 8912562

19

20

21

22

23 **Table S1.** Guaranteed values for product composition analysis.

| <b>Ingredient (%)</b> |              |
|-----------------------|--------------|
| Crude protein         | $\geq 20.0$  |
| Crude ash             | $\leq 8.0$   |
| Crude fiber           | $\leq 6.0$   |
| Calcium               | 0.70-1.40    |
| Total phosphorus      | $\geq 0.55$  |
| Sodium chloride       | 0.30-0.80    |
| methionine            | 0.42-0.90    |
| moisture              | $\leq 13.50$ |

24

25 **Table S2.** Results of gene comparison

| <b>Proteins of Selenite reduction</b> | <b>Comparison of LZ-01</b> |                                                           |
|---------------------------------------|----------------------------|-----------------------------------------------------------|
|                                       | <b>Genes</b>               | <b>Proteins</b>                                           |
| Old Yellow Enzymes (OYE)              | SAV0956                    | NADH-dependent flavin oxidoreductase                      |
| Glutathione reductase                 | SAKG03 26900               | Sulfite reductase [NADPH] flavoprotein<br>alpha-component |
| Putative formate dehydrogenase        | SAKOR 01018                | Dihydrolipoamide dehydrogenase                            |

26

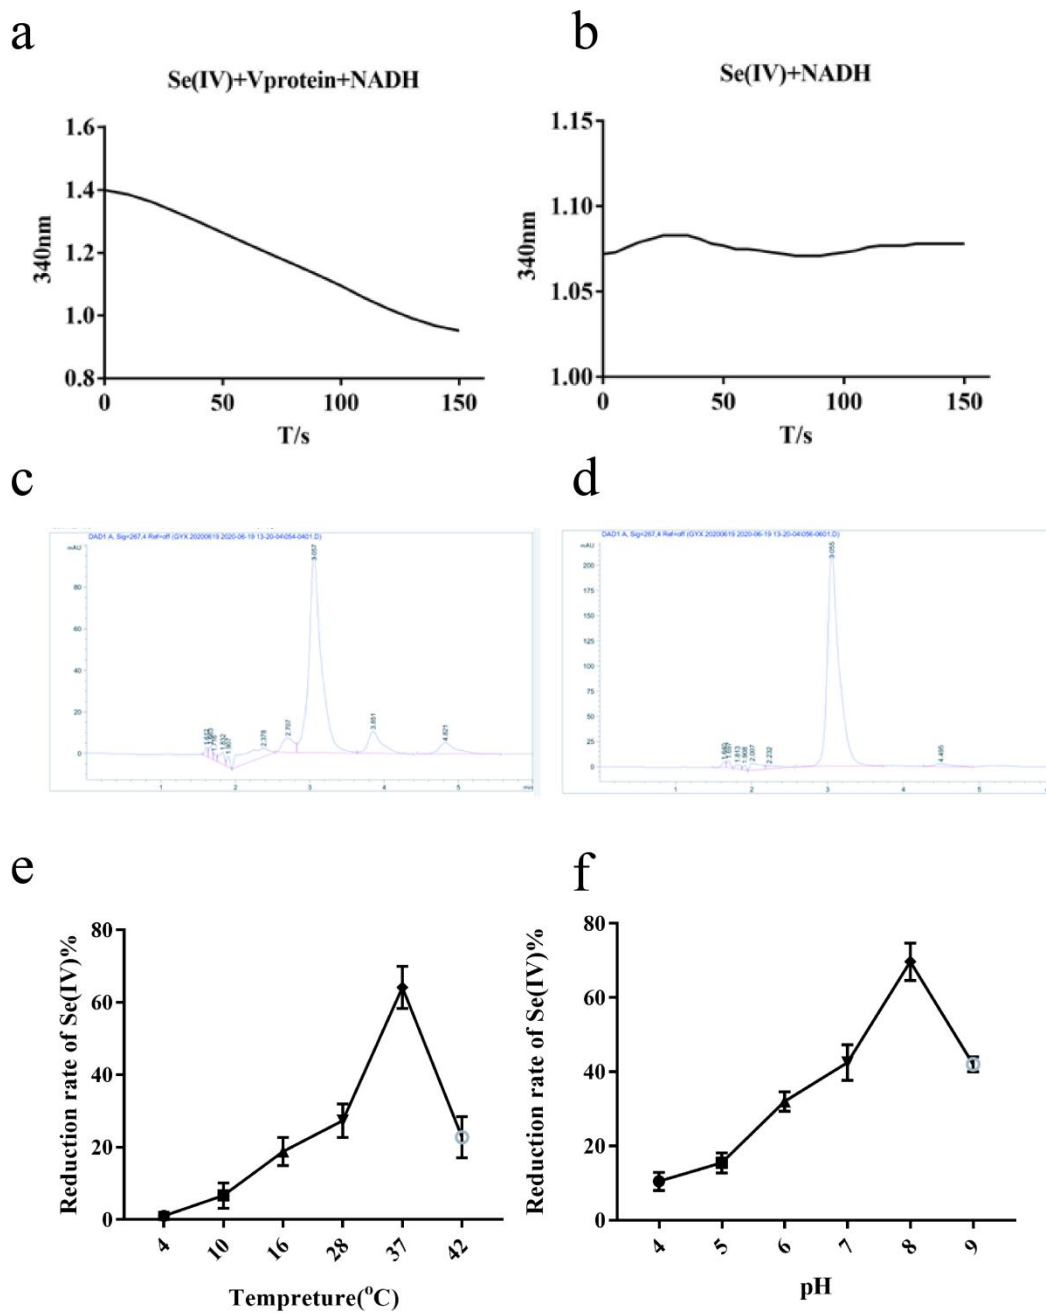

27

28 **Fig. S1.** (a) Decrease in NADH at 340nm when SerV01 binds with NADH to reduce

29 selenite. (b) No significant decrease at 340nm when SerV01 without adding NADH (c)

30 HPLC results of protein supernatant, the peak time is 3.055 min. (d) HPLC results of

31 FMN standard liquid. (e) Effects of temperature on enzyme activity (f) Effects of pH

32 on enzyme activity. Data are expressed as mean  $\pm$  standard deviation ( $n = 3$ ), with the

33 significant difference ( $P < 0.05$ ).

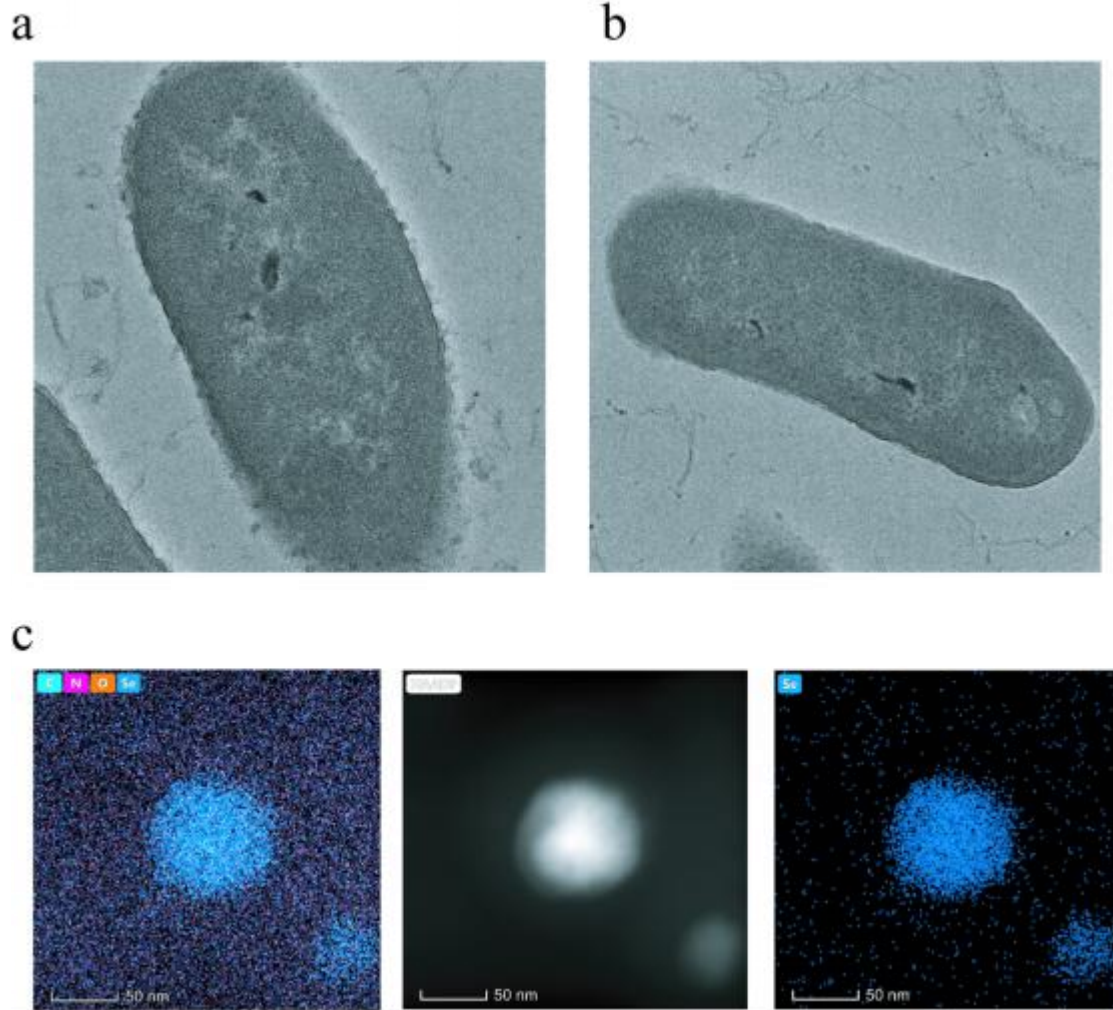

34

35

36 **Fig. S2.** (a) Sections of EcN-IS incubated in LB medium with 1 mmol/L  $\text{Na}_2\text{SeO}_3$  for  
37 4 h and the situation of reduzate SeNPs on cells was analyzed through the TEM. (b)  
38 Sections of EcN- pSB1A3 incubated in LB medium with 1 mmol/L  $\text{Na}_2\text{SeO}_3$  for 4 h  
39 (c) The reduzate SeNPs were analyzed by the TEM mapping method.

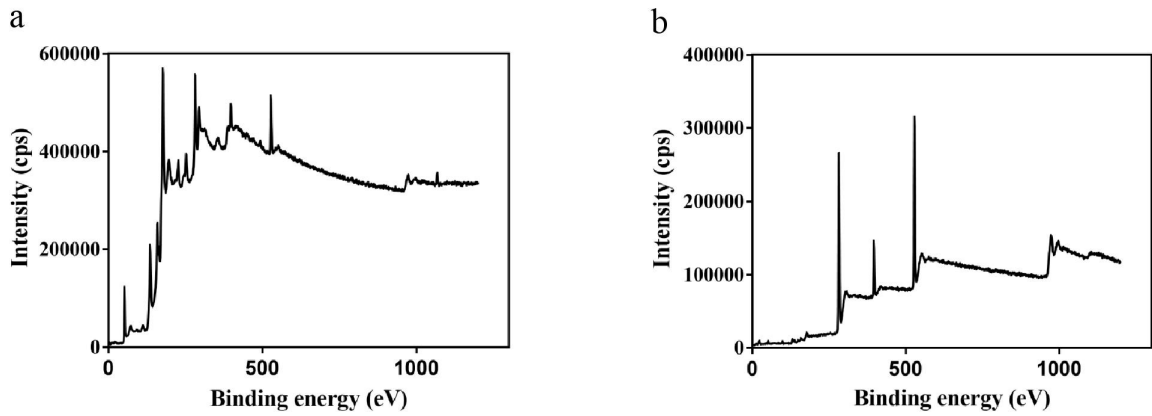

40

41 **Fig. S3.** (a) XPS spectrum of elements C, N, O, P, S, Se in Chem-SeNPs. (b) XPS

42 spectrum of elements C, N, O, P, S, Se in Bio-SeNPs.

43

44

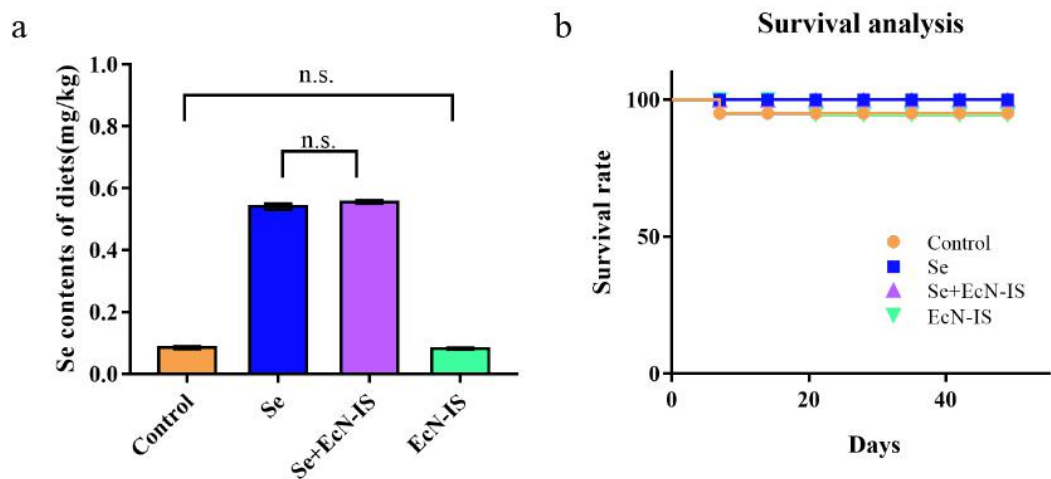

45

46 **Fig. S4.** (a) The concentration of Se in different diets (Control, Se, Se+EcN-IS,

47 EcN-IS). (b) The survival analysis of different treatments (Control, Se, Se+EcN-IS,

48 EcN-IS). (n.s.  $P > 0.05$ , \* $P \leq 0.05$ , \*\* $P \leq 0.01$ , \*\*\* $P \leq 0.001$ , \*\*\*\* $P \leq 0.0001$ ).

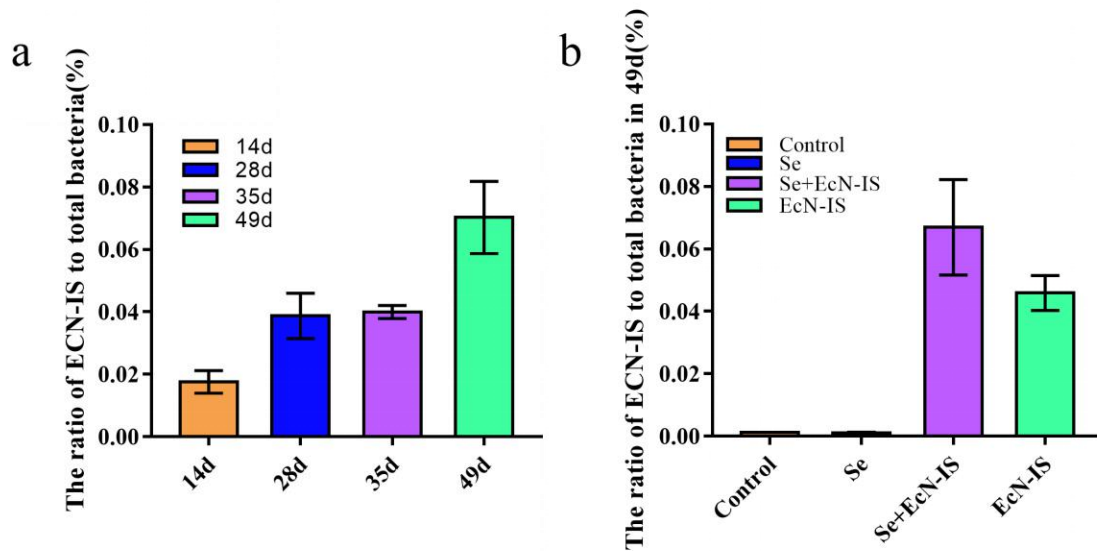

49

50 **Fig. S5.** (a) EcN-IS colonization in broilers cecum contents after the oral  
 51 administration of EcN-IS was terminated at the 14th, 28th, 35th and 49th days,  
 52 respectively. (b) Colonization in broilers cecum contents among four groups on the  
 53 49th day. Data are expressed as mean  $\pm$  standard deviation ( $n = 3$ ), with the significant  
 54 difference ( $P < 0.05$ ).

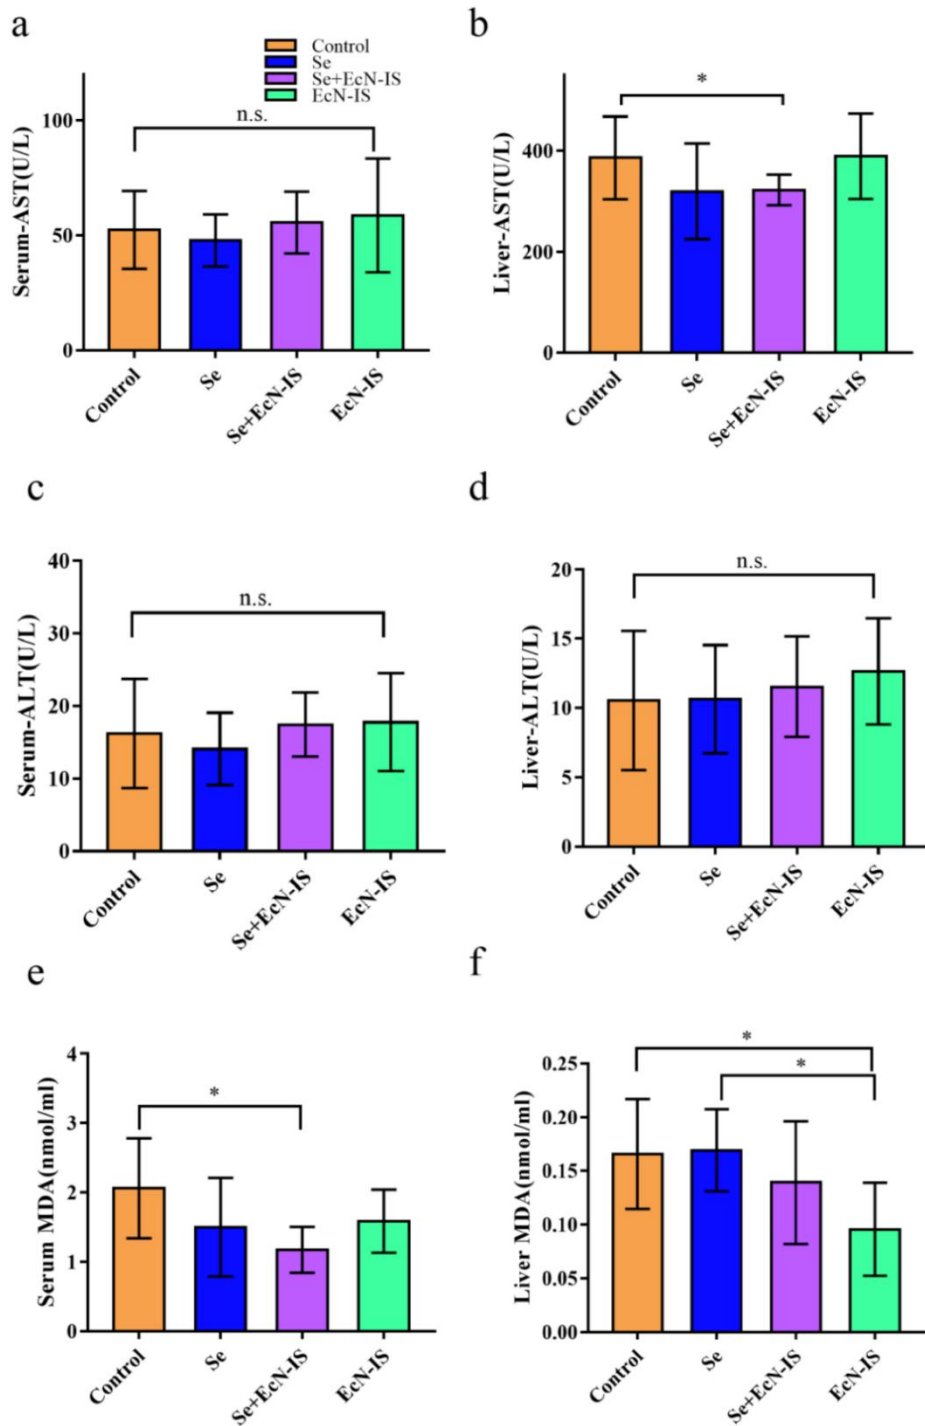

55

56 **Fig. S6.** Activities of hepatic metabolic enzymes and index of membrane lipid

57 peroxidation in liver and serum, (a,b) AST of serum and liver, (c,d) ALT of serum and

58 liver (e,f) MDA of serum and liver. Data are expressed as mean  $\pm$  standard deviation

59 (n = 10), with the significant difference  $P < 0.05$ . (n.s.  $P > 0.05$ , \* $P \leq 0.05$ , \*\* $P \leq$

60 0.01, \*\*\* $P \leq 0.001$ , \*\*\*\* $P \leq 0.0001$ ).
